# Supplementary material
Source: PubMed Central journal article supplement (PMC4259524)
Supplement: NIHMS60766-supplement-01.pdf [file NIHMS60766-supplement-01.pdf]

Bystander cells

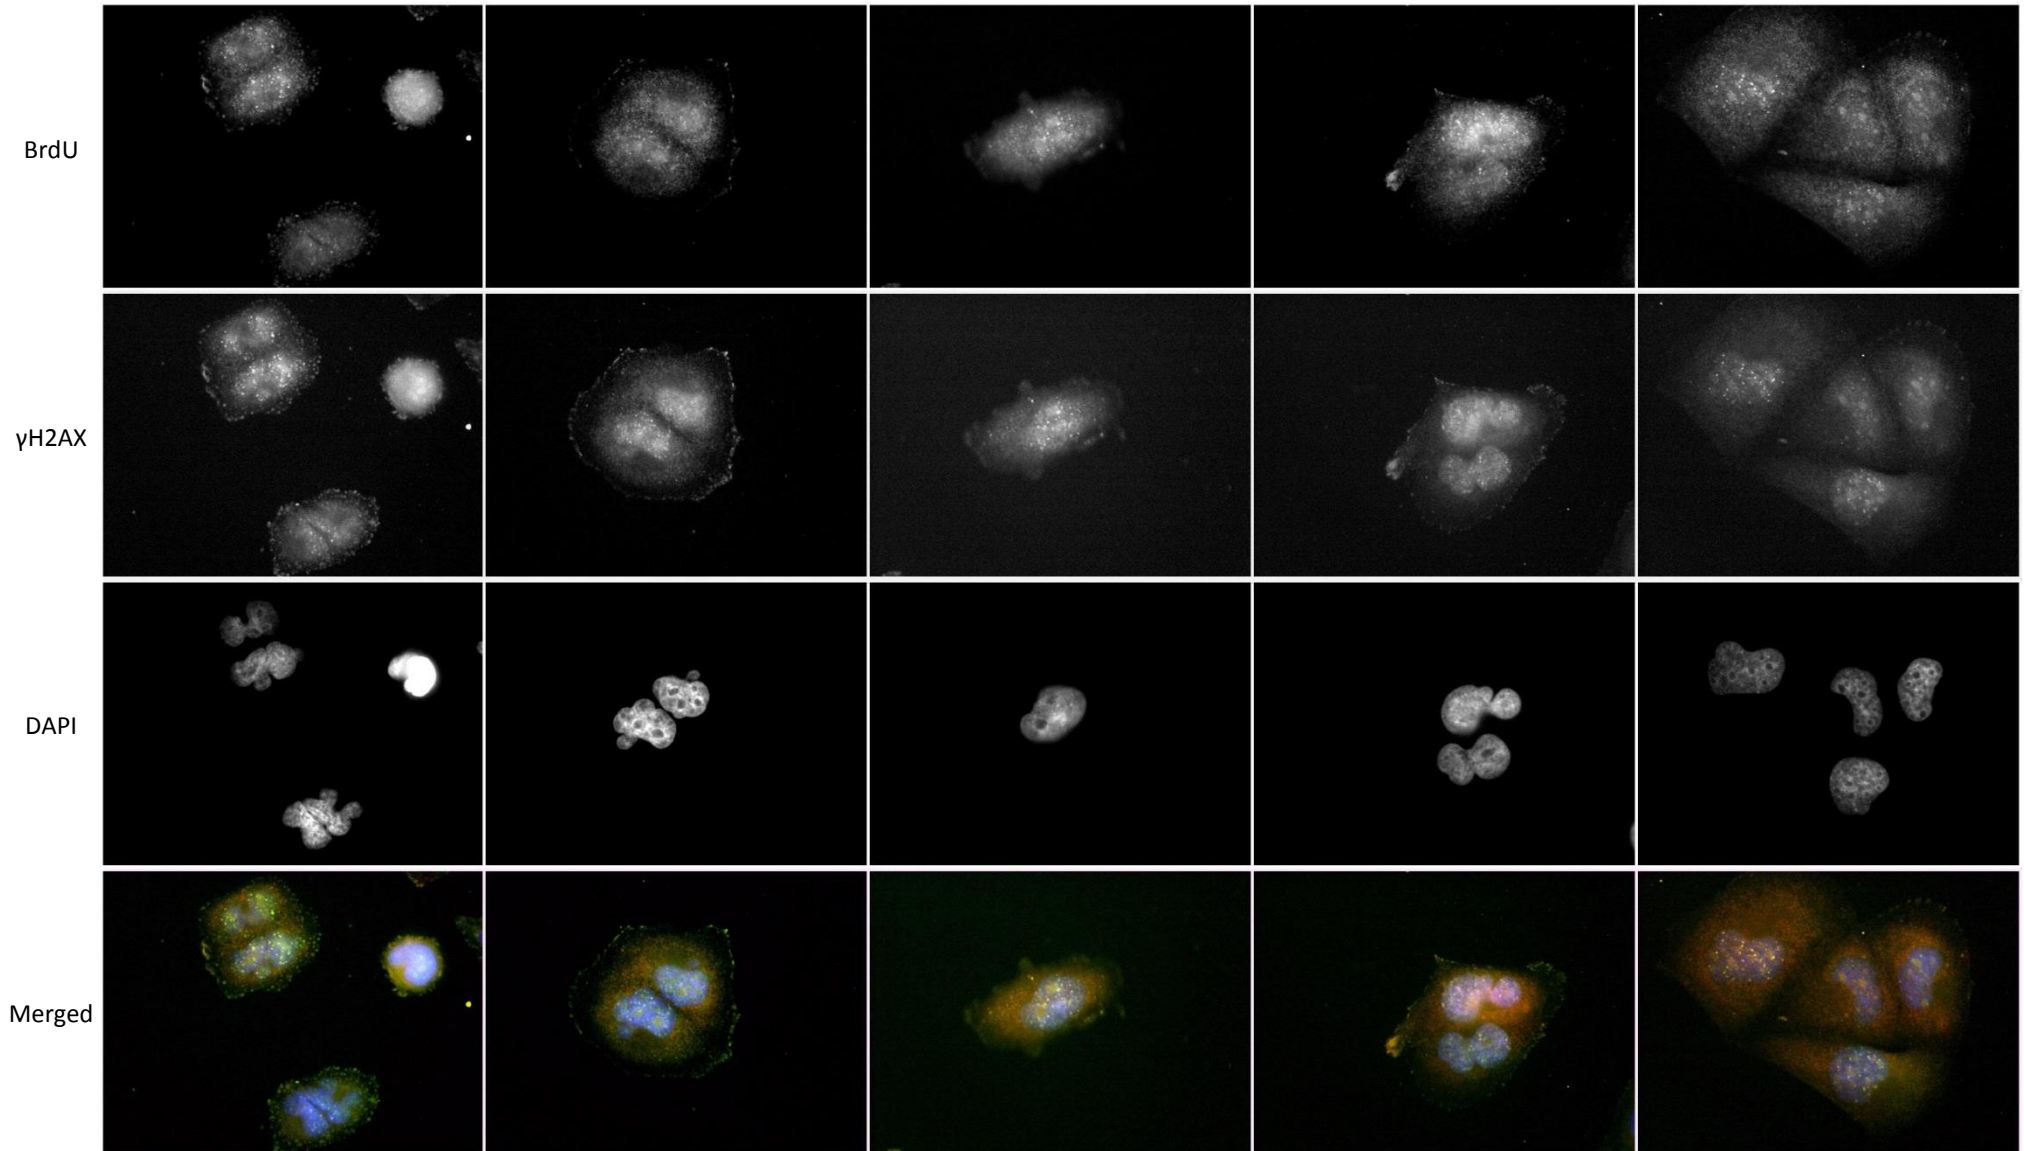

**Figure S1A.** Immunofluorescence microscopy of BrdU foci (red) and  $\gamma$ H2AX foci (green) at sites of stalled replication in bystander cells. Samples were counter-stained with DAPI (blue). See Figure 1A for details. Each image is 162  $\mu$ m wide.

Bystander cells, Filipin-treated

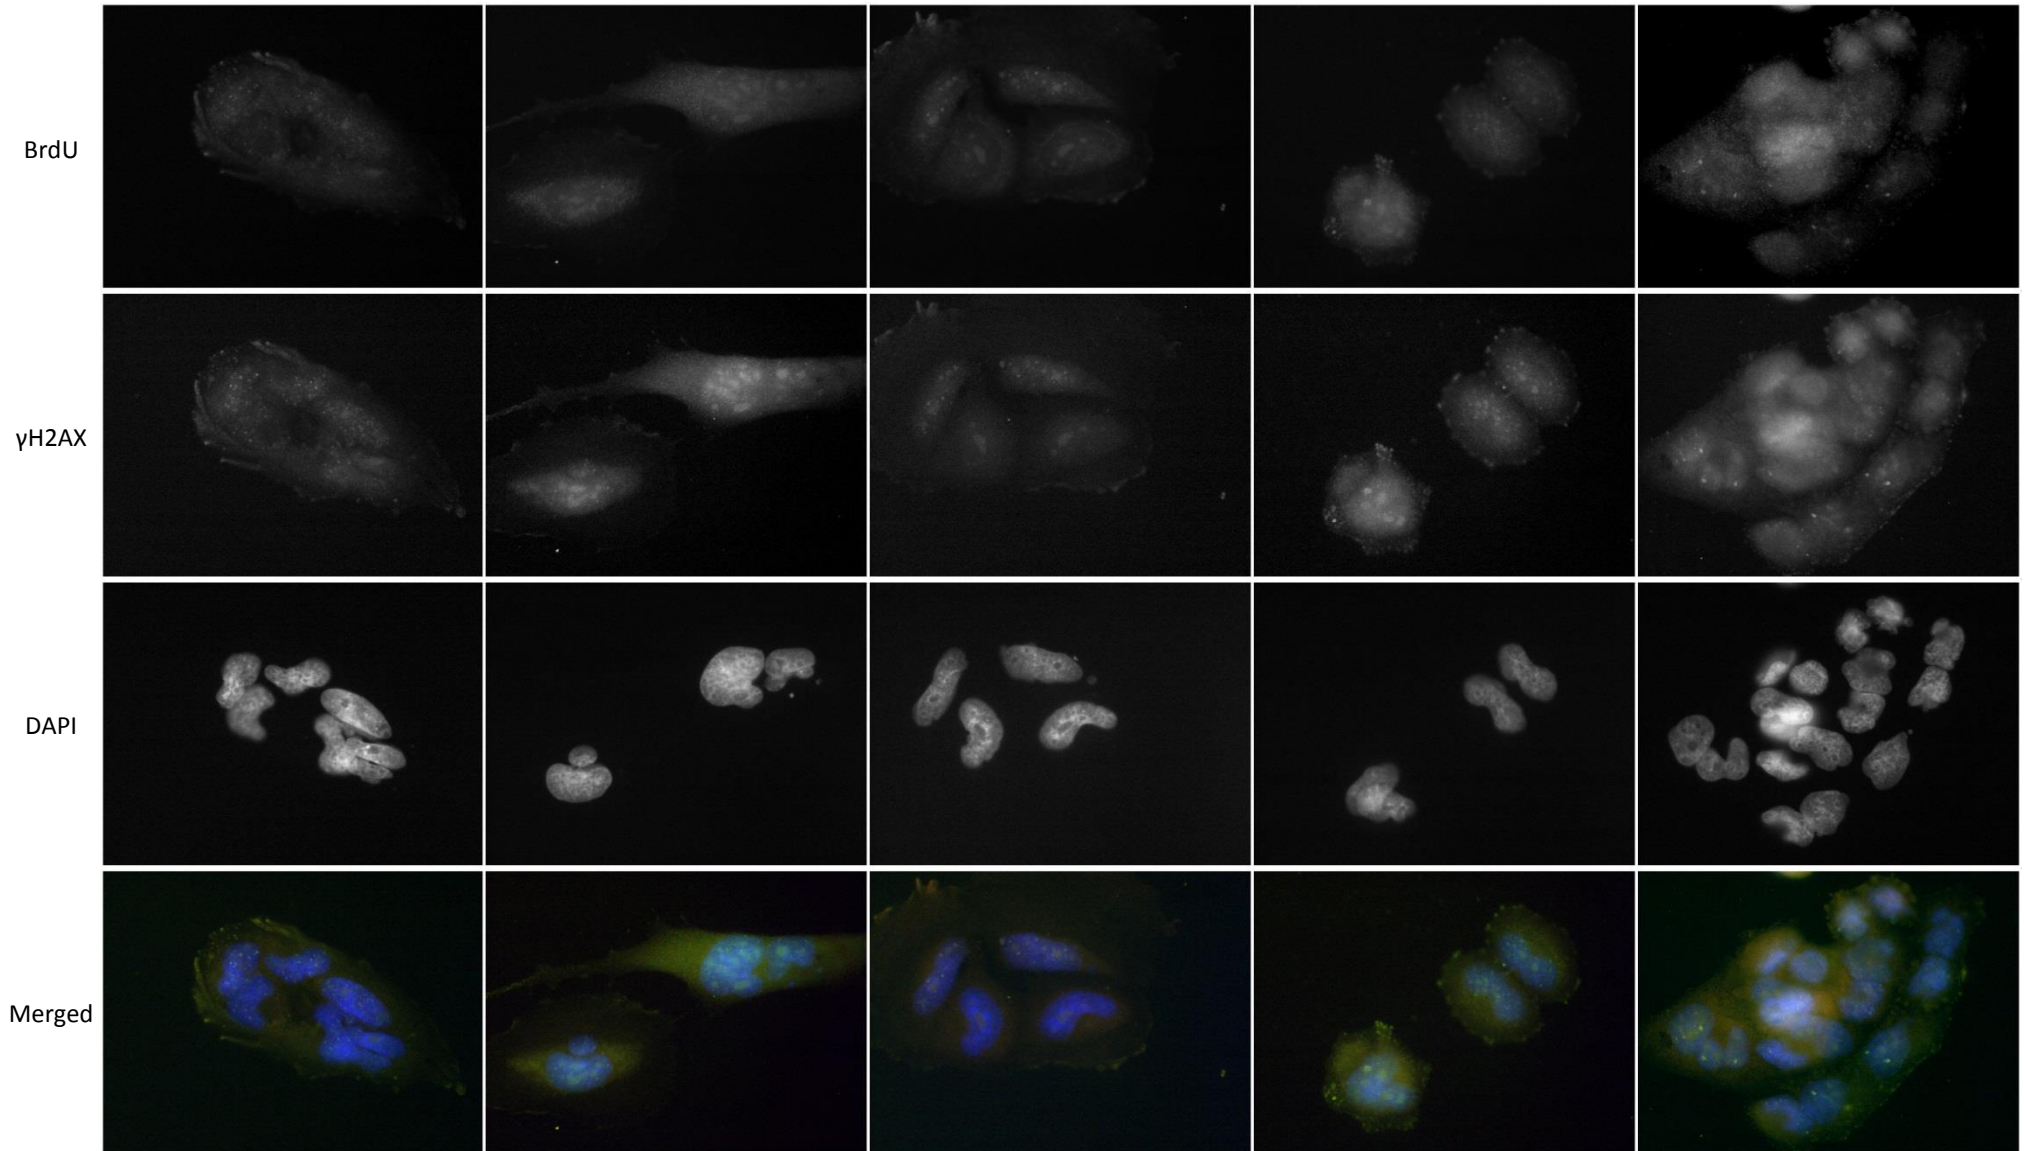

**Figure S1B.** Immunofluorescence microscopy of BrdU foci (red) and  $\gamma$ H2AX foci (green) at sites of stalled replication in bystander cells treated with Filipin. Samples were counter-stained with DAPI (blue). See Figure 1B for details. Each image is 162  $\mu$ m wide.

Bystander cells, DMSO-treated

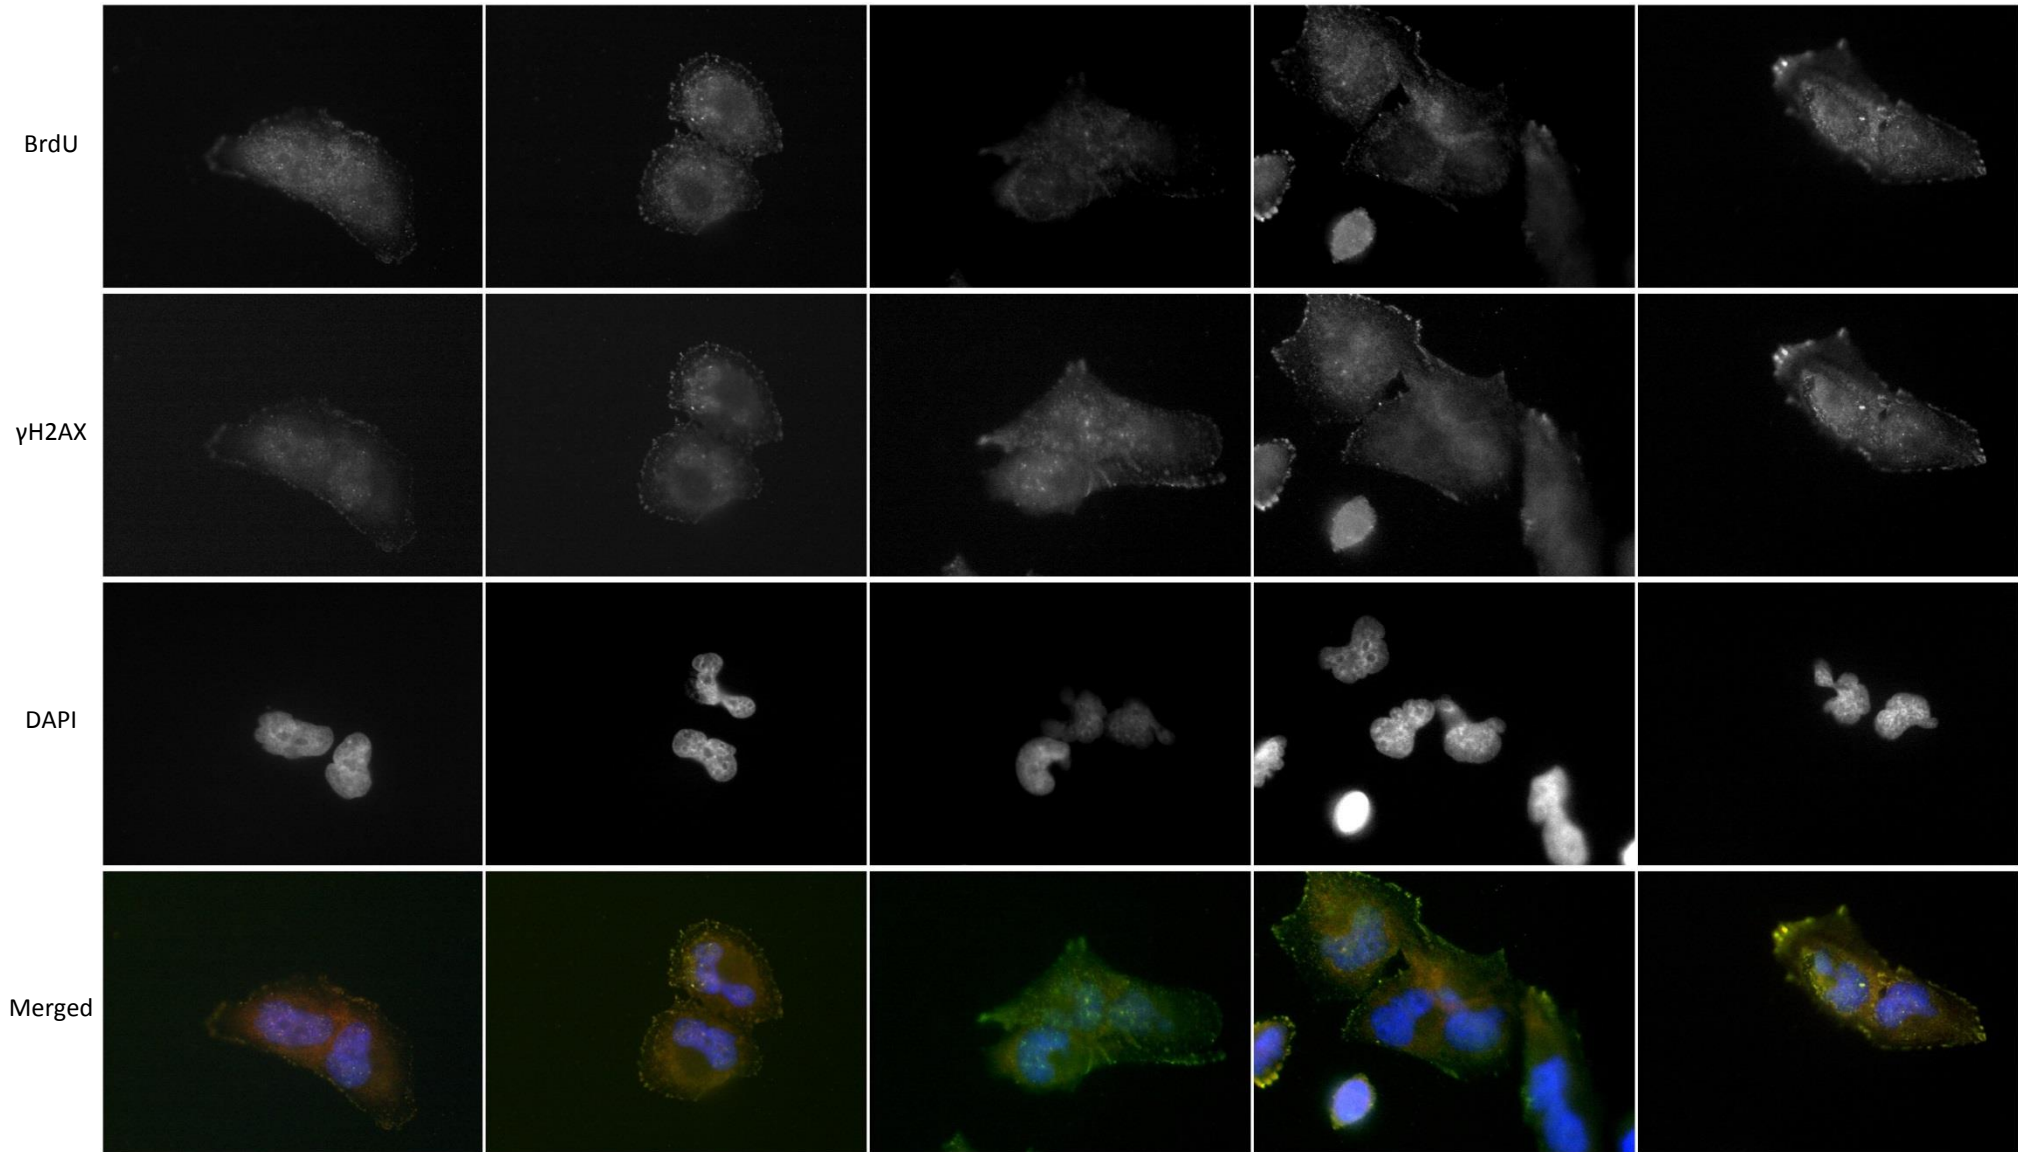

**Figure S1C.** Immunofluorescence microscopy of BrdU foci (red) and  $\gamma$ H2AX foci (green) at sites of stalled replication in bystander cells treated with DMSO. Samples were counter-stained with DAPI (blue). See Figure 1B for details. Each image is 162  $\mu$ m wide.

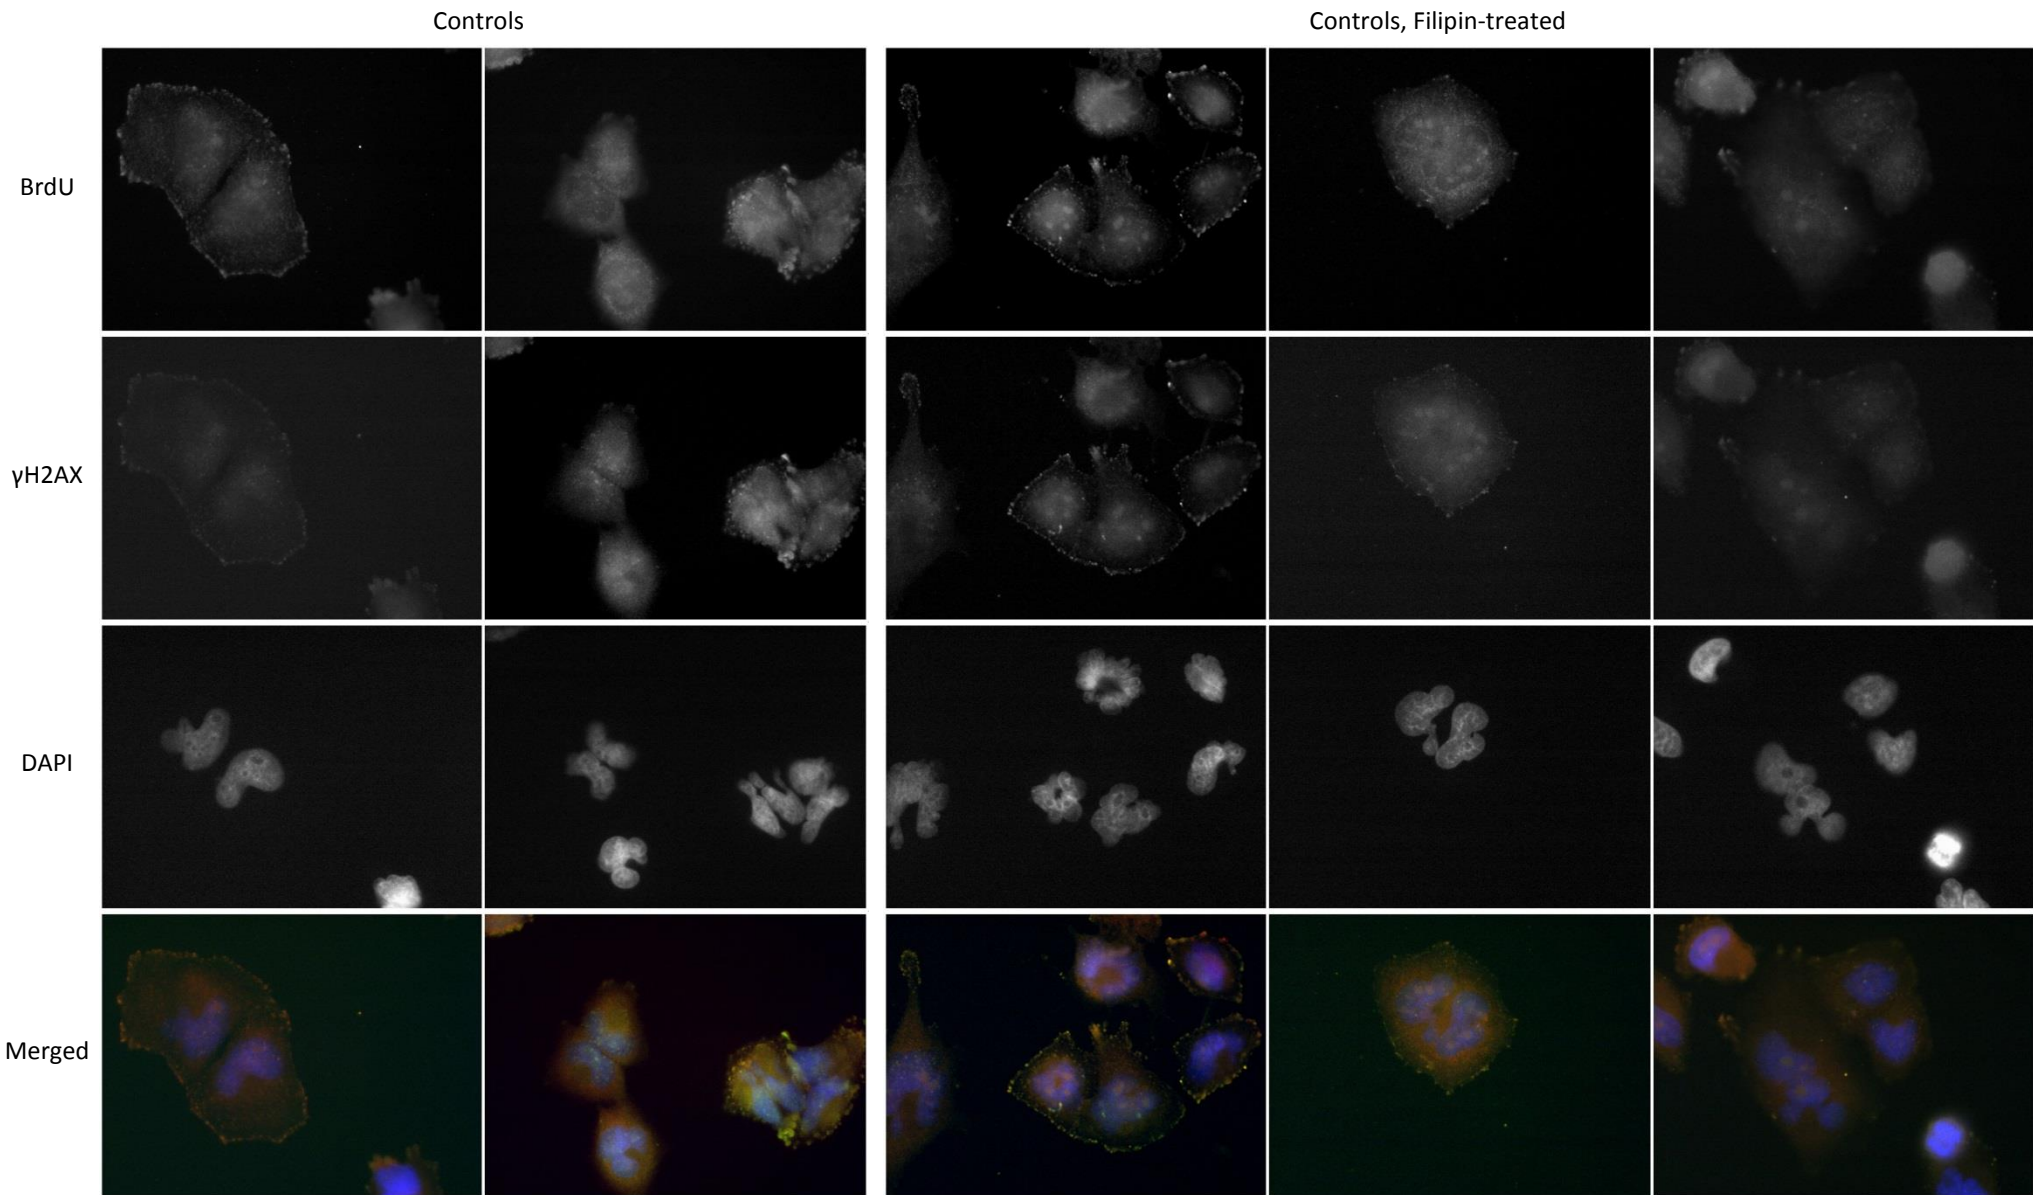

**Figure S1D.** Immunofluorescence microscopy of BrdU foci (red) and  $\gamma$ H2AX foci (green) at sites of stalled replication in untreated and Filipin-treated control cells. Samples were counter-stained with DAPI (blue). See Figure 1B for details. Each image is 162  $\mu$ m wide.

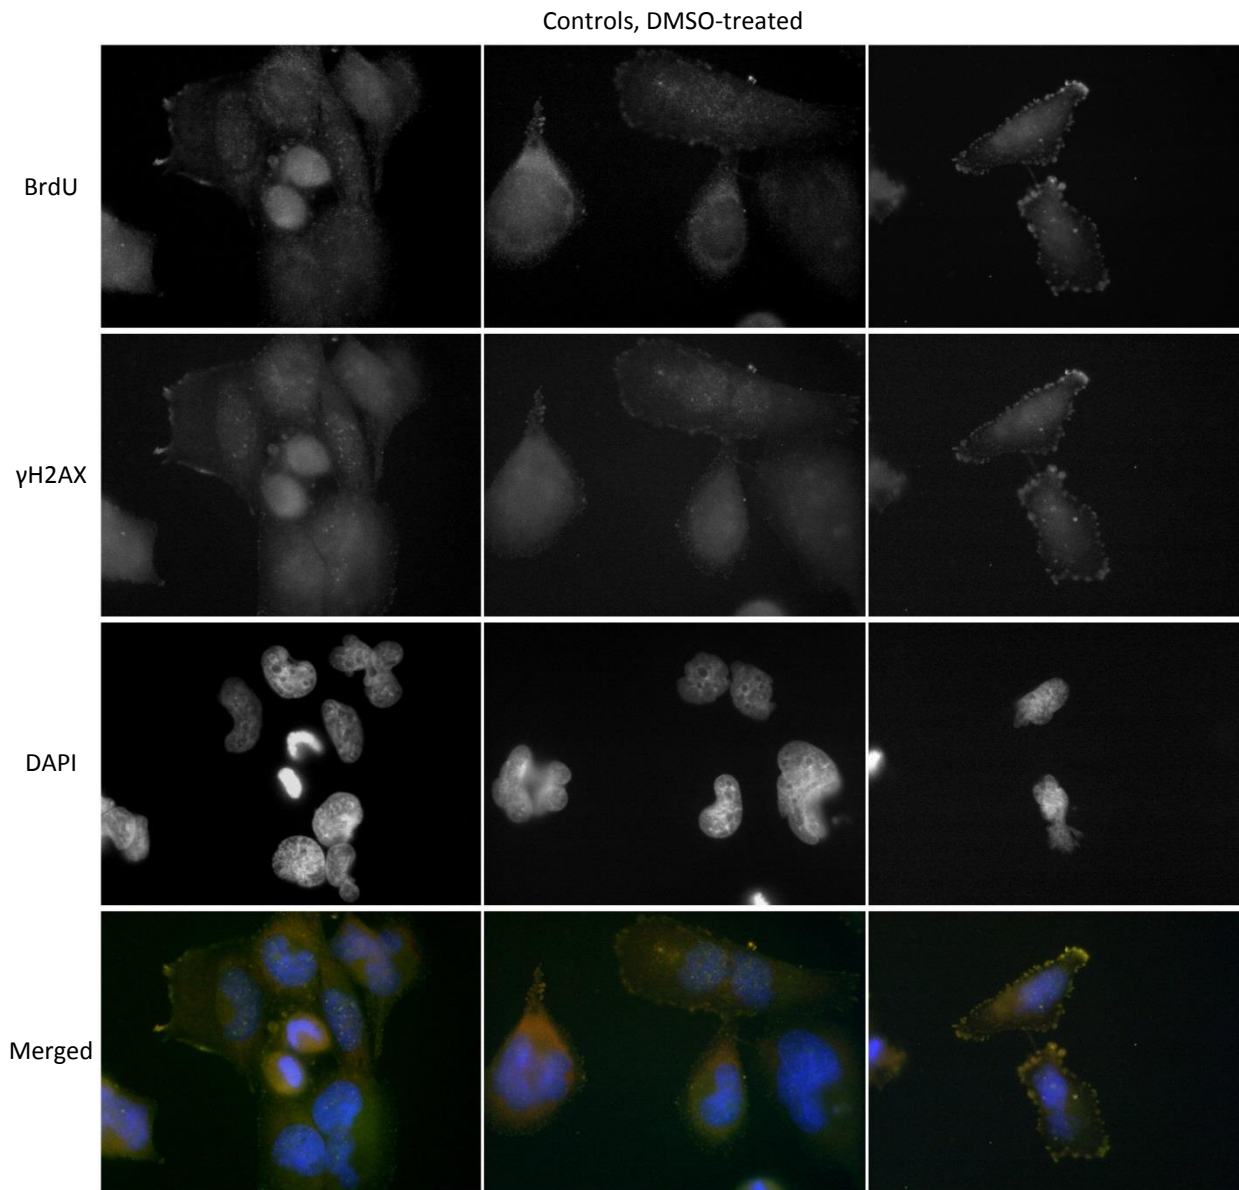

**Figure S1E.** Immunofluorescence microscopy of BrdU foci (red) and  $\gamma$ H2AX foci (green) at sites of stalled replication in DMSO-treated control cells. Samples were counter-stained with DAPI (blue). See Figure 1B for details. Each image is 162  $\mu$ m wide.

Bystander cells

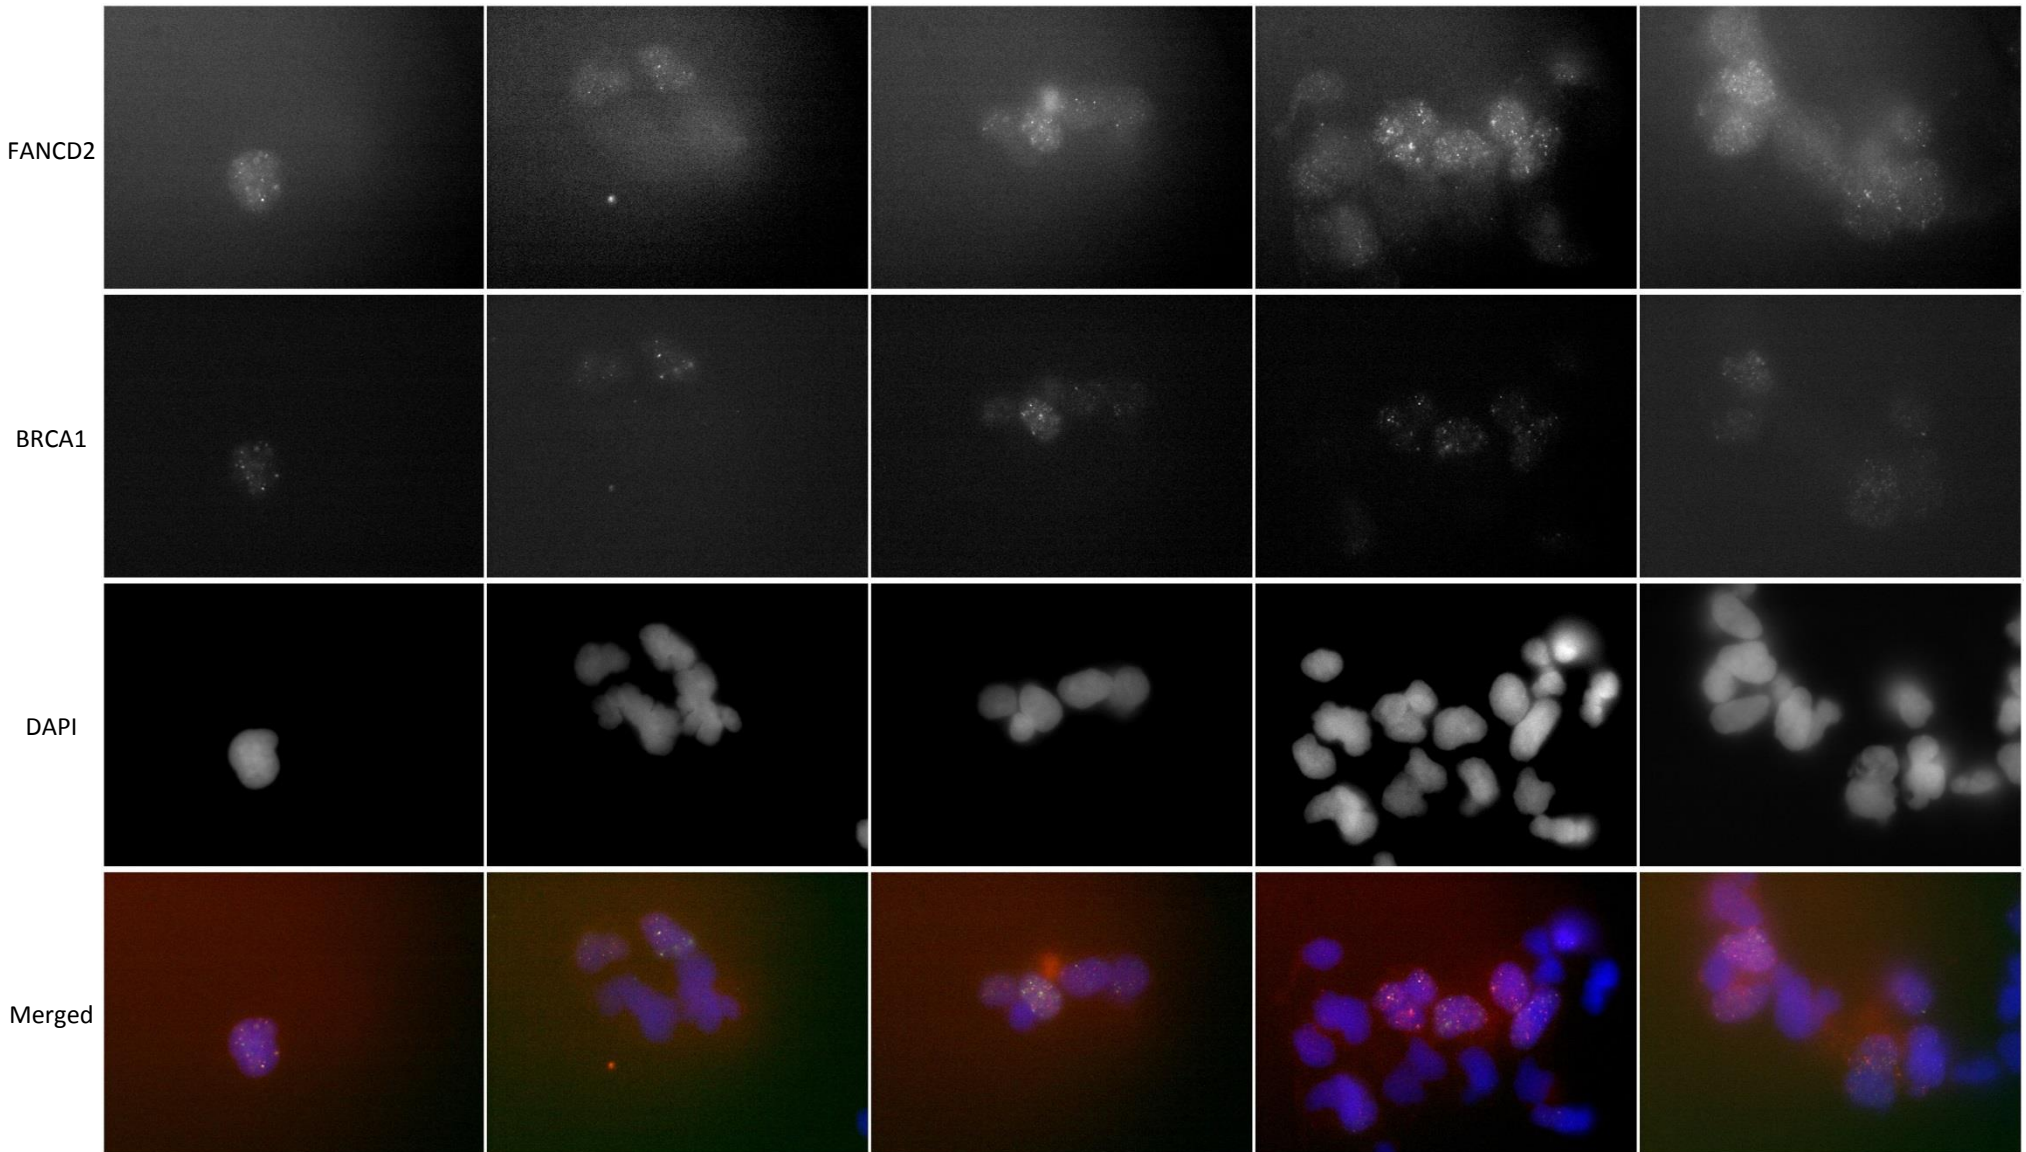

**Figure S2A.** Co-immunofluorescence microscopy of FANCD2 foci (red) and BRCA1 foci (green) at sites of stalled replication in bystander cells. Samples were counter-stained with DAPI (blue). See Figures 2A and 3A for details. Each image is 97  $\mu\text{m}$  wide.

Bystander cells

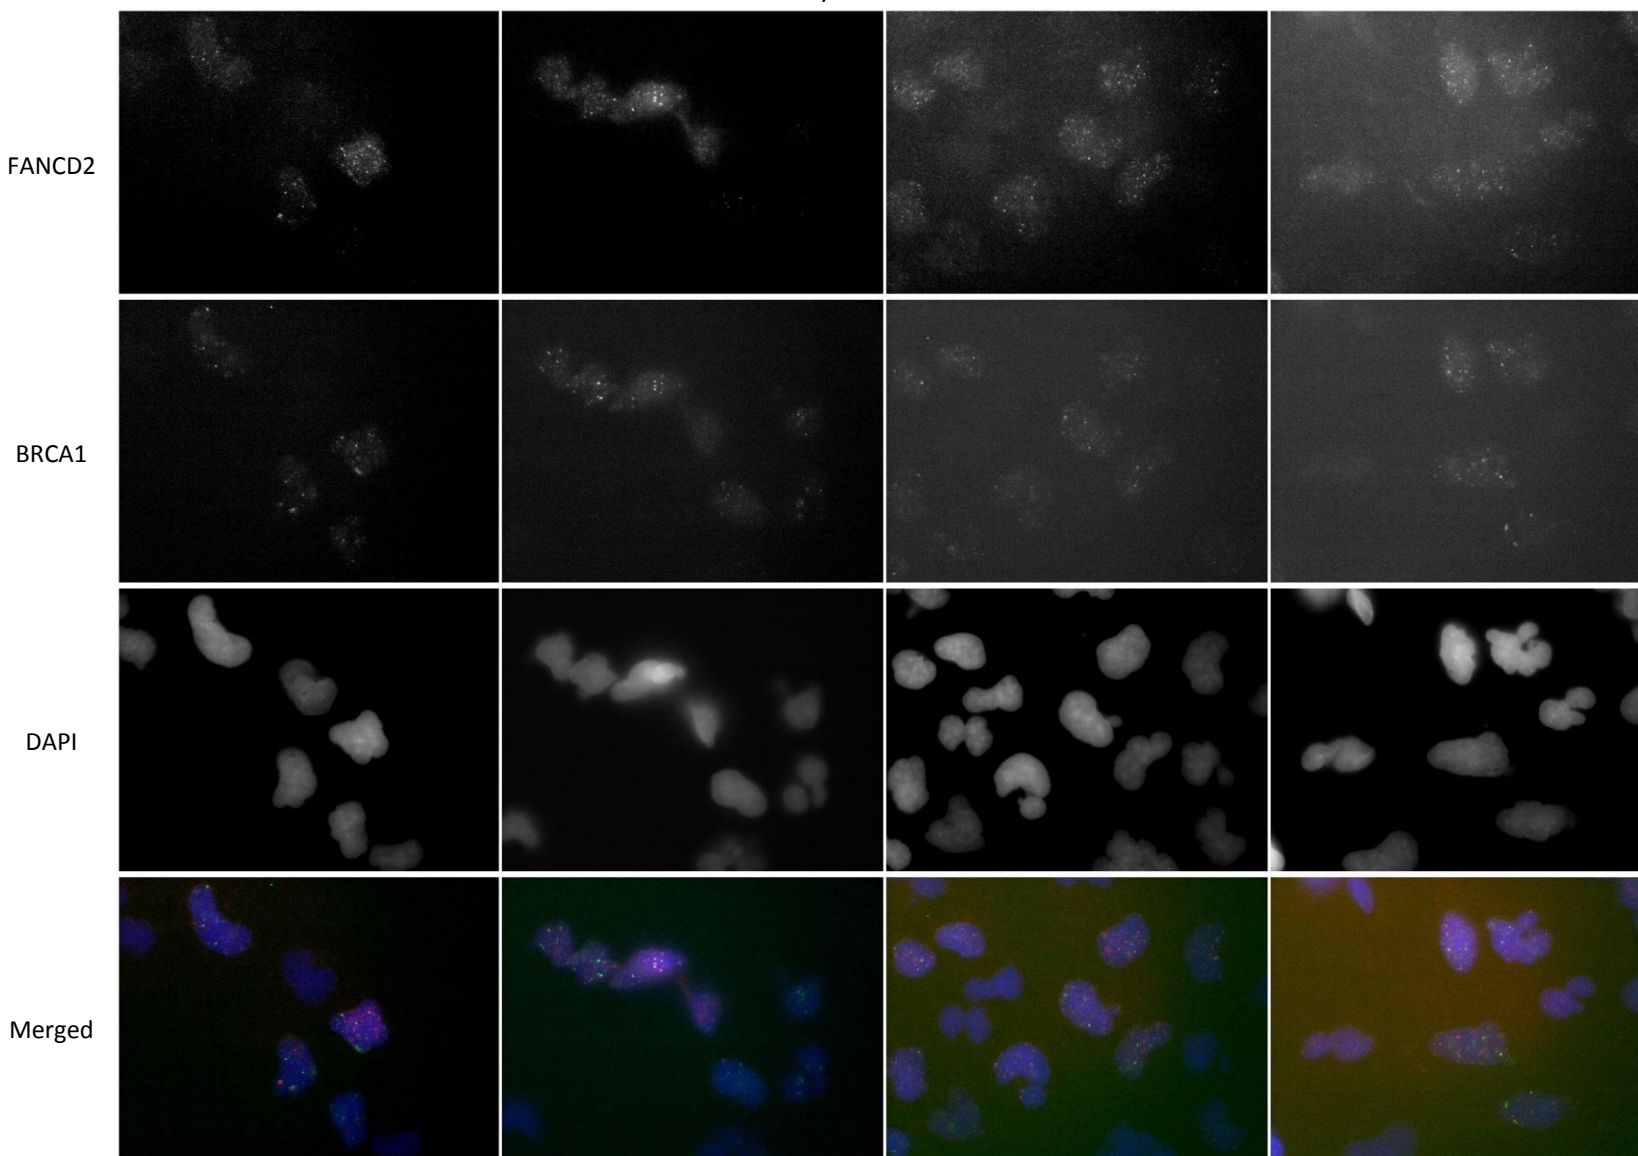

**Figure S2A, cont'd.** Co-immunofluorescence microscopy of FANCD2 foci (red) and BRCA1 foci (green) at sites of stalled replication in bystander cells. Samples were counter-stained with DAPI (blue). See Figures 2A and 3A for details. Each image is 97  $\mu\text{m}$  wide.

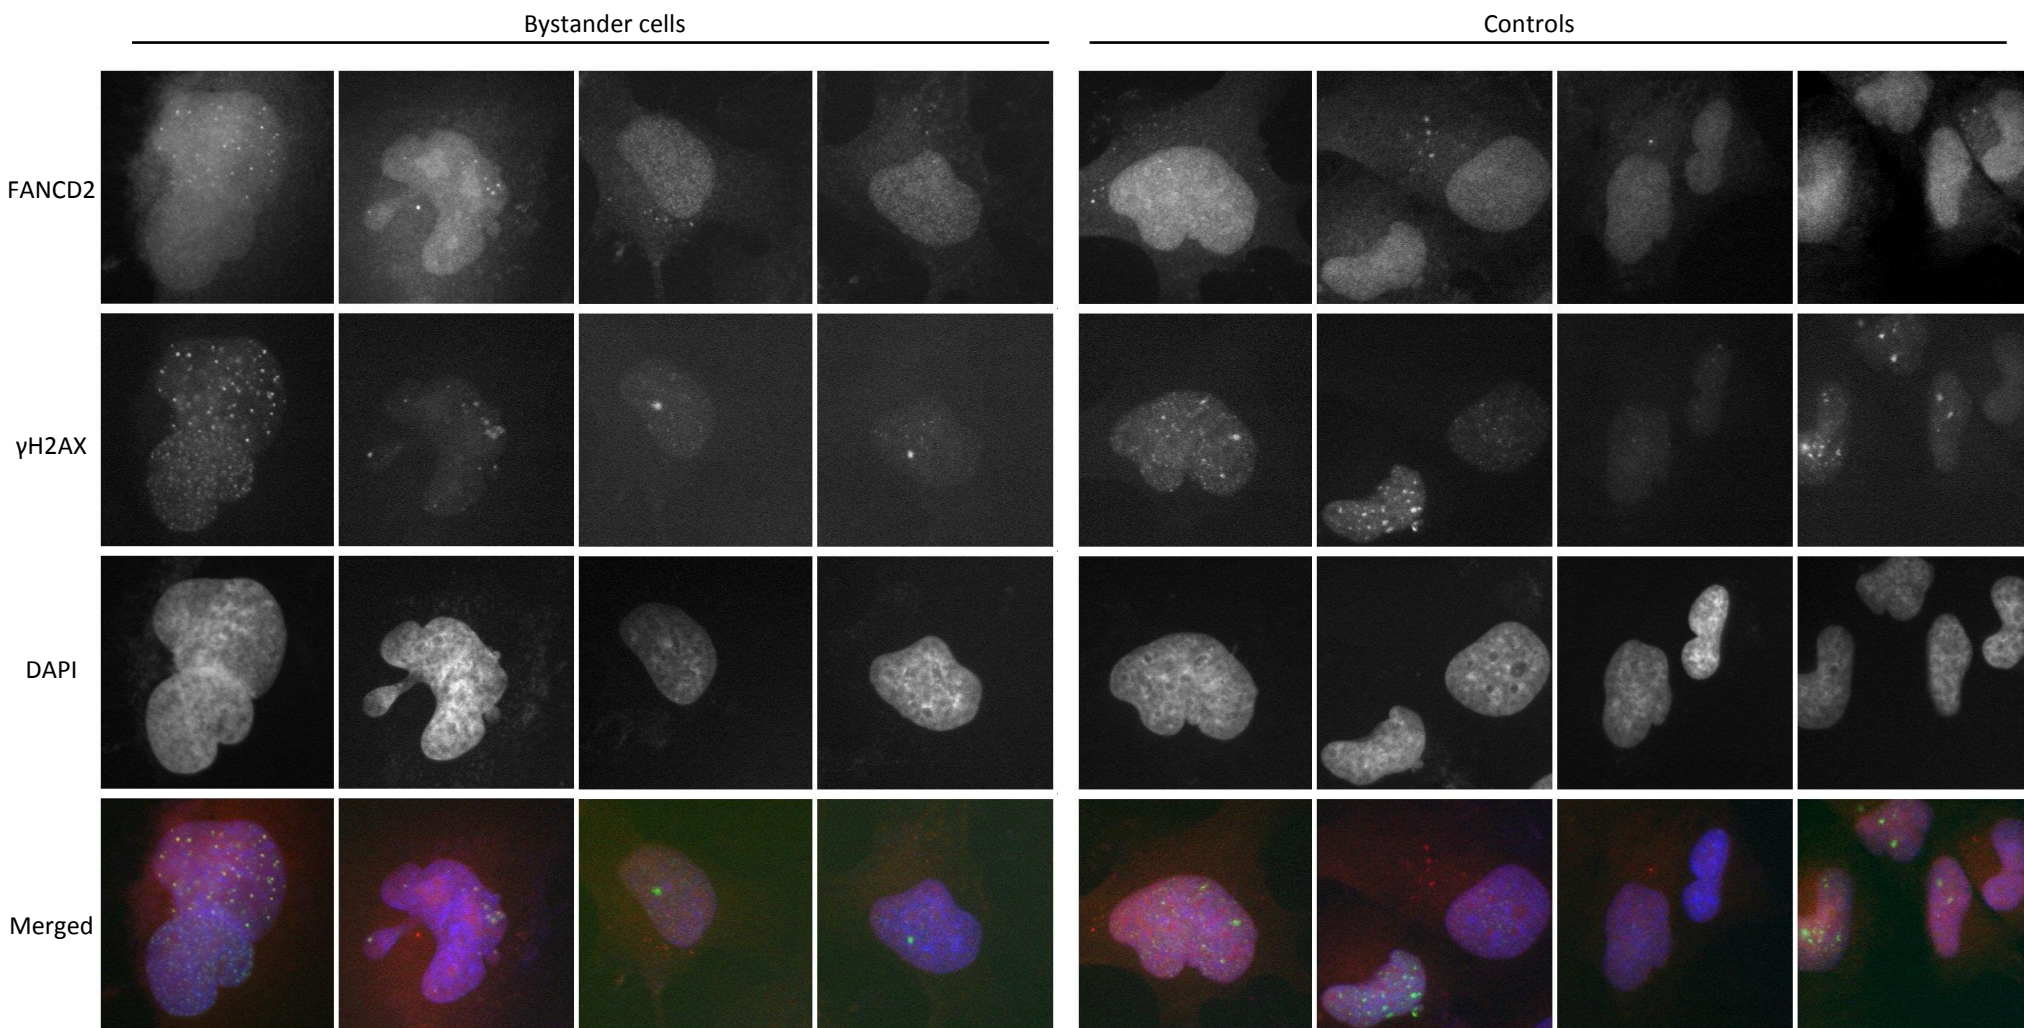

**Figure S2B.** Co-immunofluorescence microscopy of FANCD2 foci (red) and  $\gamma$ H2AX foci (green) at sites of stalled replication in bystander cells. Samples were counter-stained with DAPI (blue). Each image is 38  $\mu$ m wide.



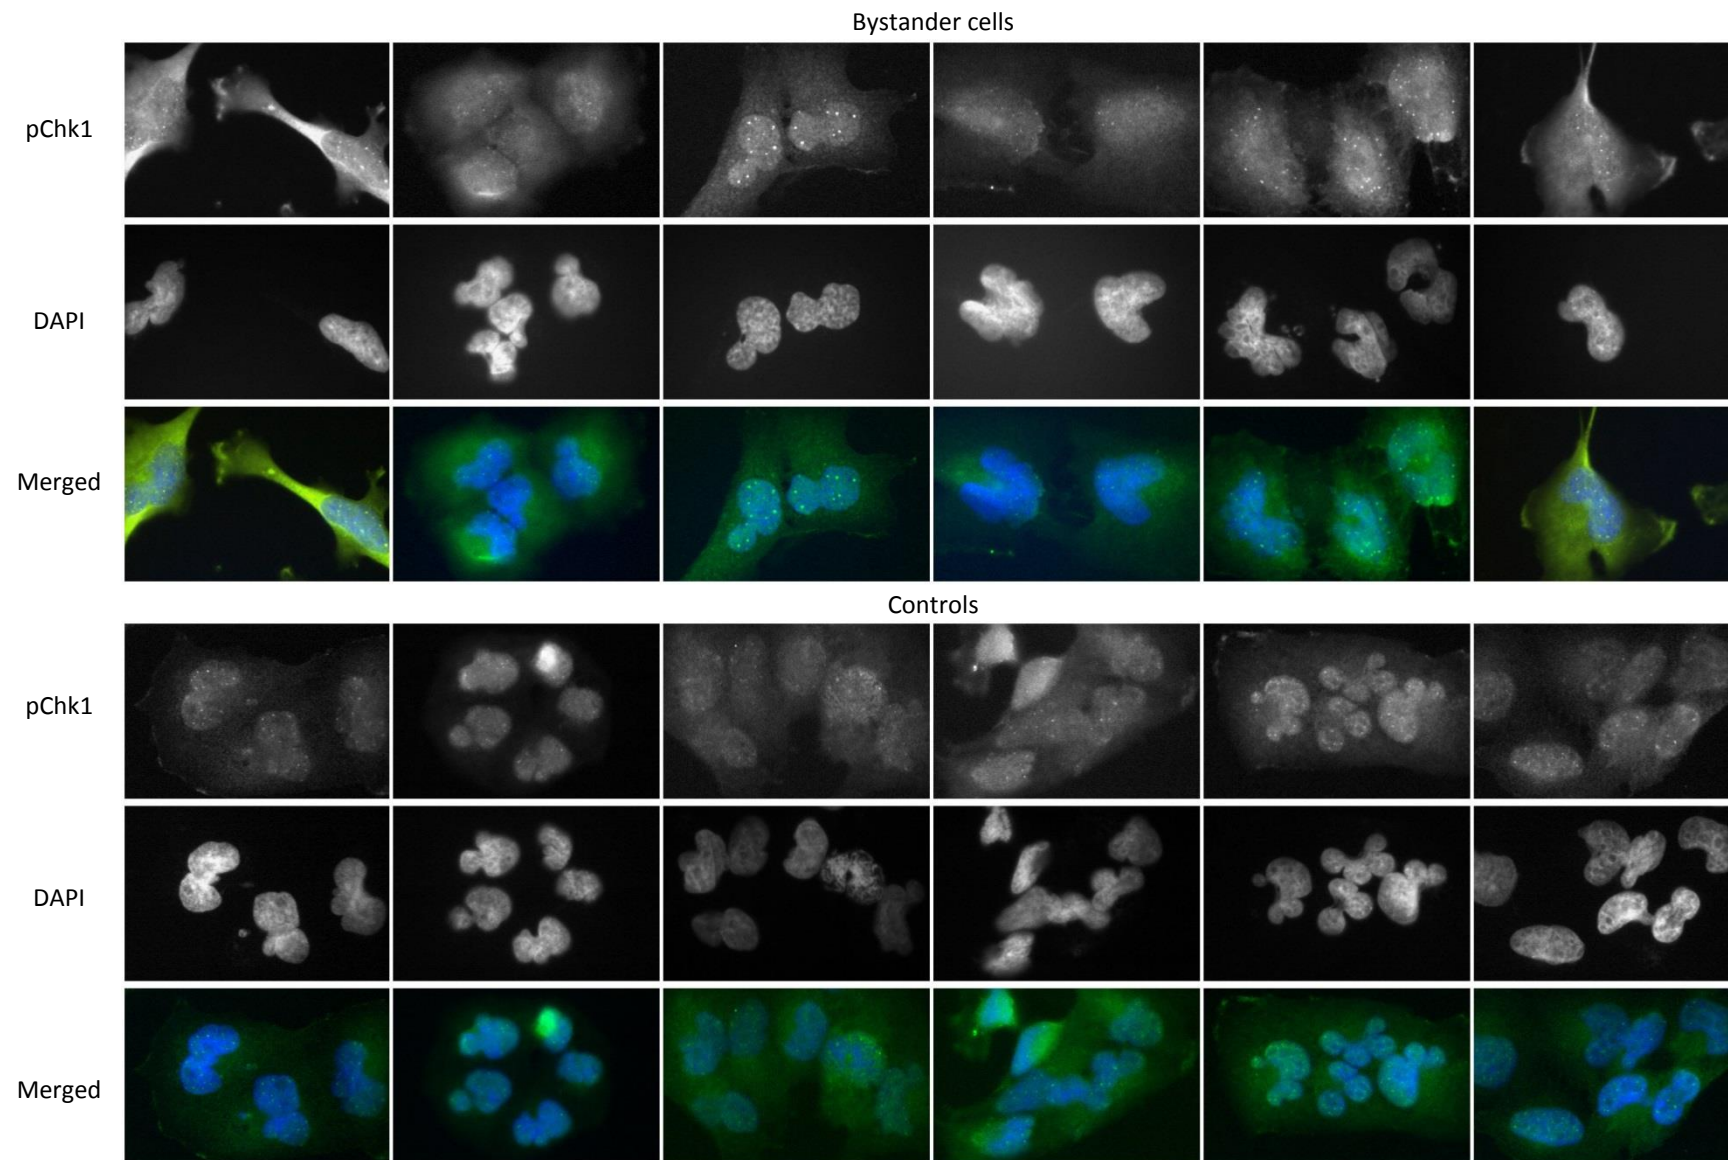

**Figure S3.** Immunofluorescence microscopy of pChk1 foci (green) in bystander cells. Samples were counter-stained with DAPI (blue). See Figure 5A for details. Each image is 57  $\mu\text{m}$  wide.

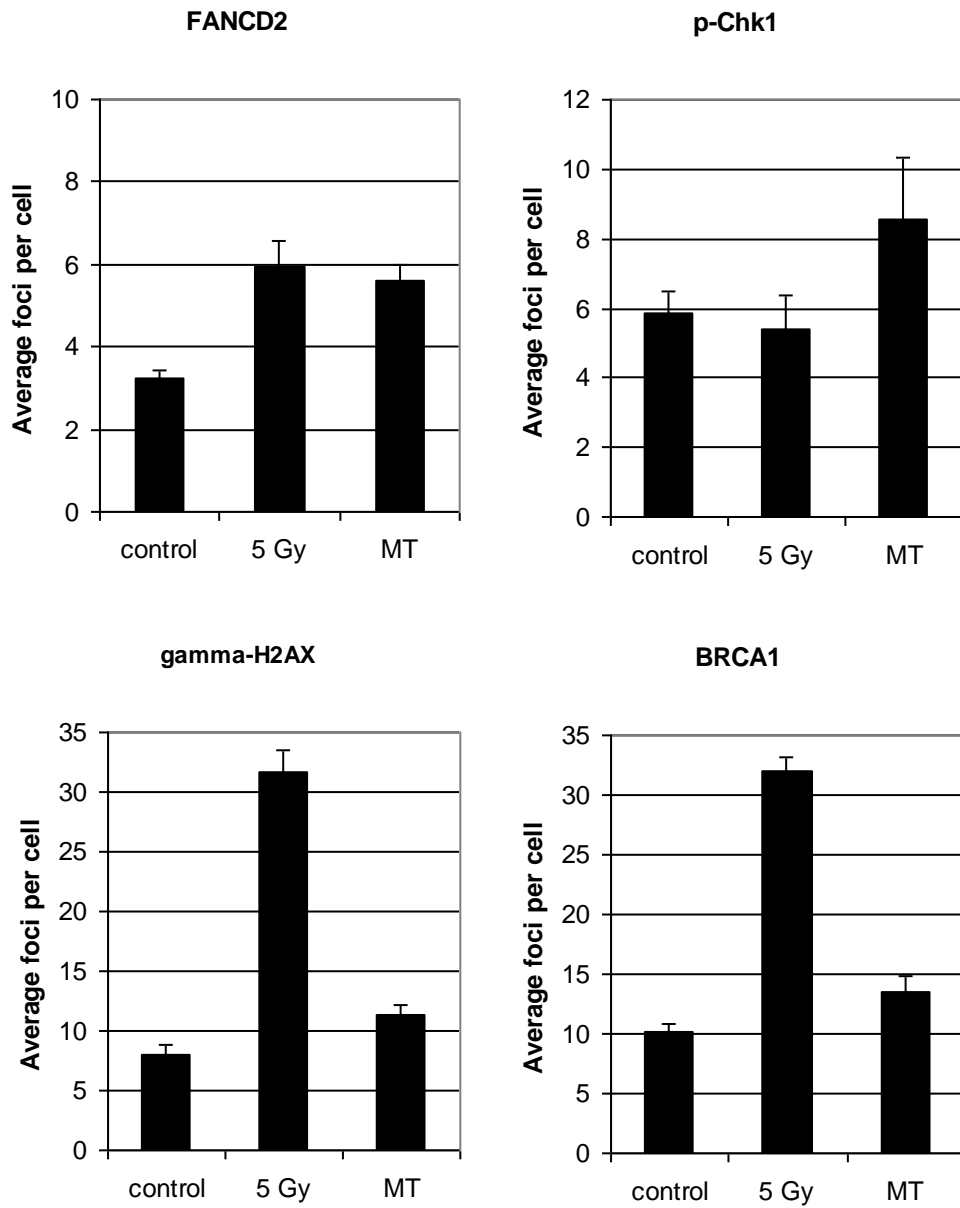

**Figure S4.** Average number of p-Chk1, FANCD2, BRCA1 and gamma-H2AX foci per T98G cell in foci-bearing cells only in control, 5 Gy-irradiated and bystander cell cultures treated with medium from 2 Gy-irradiated cells. Foci data were collected from a total of 348 control, 333 bystander cells and 305 directly irradiated cells in two experiments. The analysis includes foci bearing cells only. Error bars show the standard errors.

Bystander cells

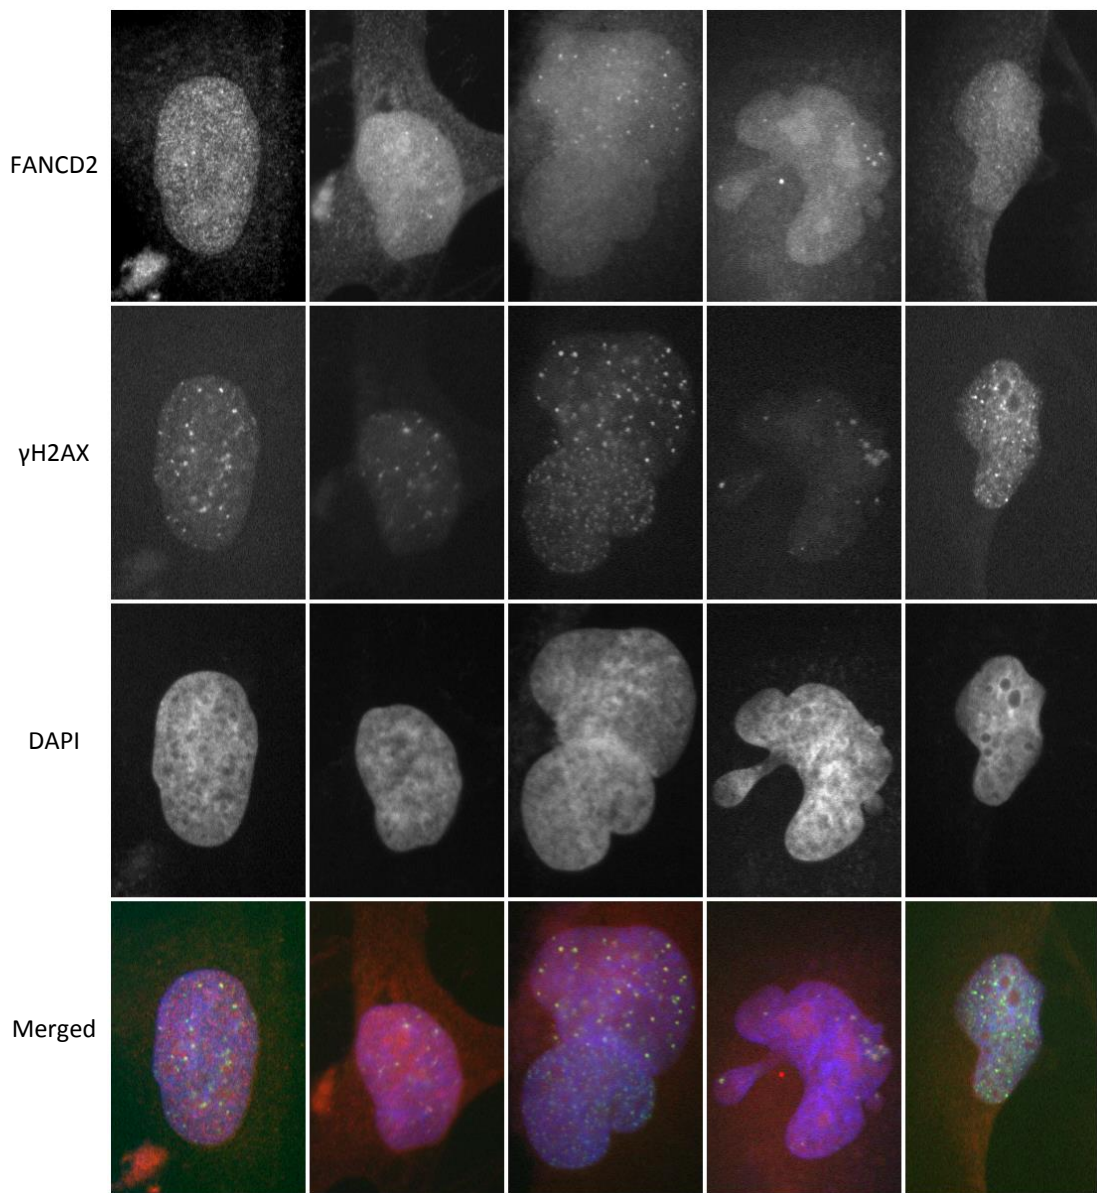

**Figure S5.** Immunofluorescence microscopy of FANCD2 foci (red) and  $\gamma$ H2AX foci (green) in bystander cells. Samples were counter-stained with DAPI (blue).
